# Supplementary material for: A CdS/MnS p–n heterojunction with a directional carrier diffusion path for efficient photocatalytic H2 production
Source: Royal Society of Chemistry journal article supplement (doi:10.1039/d1qi01632f), 2022-01-01
Supplement: d1qi01632f1.pdf [file d1qi01632f1.pdf]

## **CdS/MnS p-n heterojunctions with directional carriers diffusion path for efficient photocatalytic H<sub>2</sub> production**

Hao Zhang<sup>a</sup>, Qi Feng<sup>a\*</sup>, Yue Zhang<sup>a</sup>, Jin Zhang<sup>a</sup>, Xiongtao Wu<sup>a</sup>, Yanlei Li<sup>a</sup>, Lixiong Yin<sup>a</sup>, Jianfeng Huang<sup>a</sup>, Xingang Kong<sup>a\*</sup>

<sup>a</sup> School of Materials Science and Engineering, Shaanxi University of Science and Technology, Weiyang, Xi'an, Shaanxi 710021, PR China

### **Characterization**

The TD-3500 X-ray diffractometer operates at 40 kV and 30 mA using Cu K $\alpha$  radiation is used to research the XRD patterns of the samples. FEI Apreo-S SEM system is employed to study the microstructure of samples. FEI Tecnai G2F20S-TWIN is employed to take transmission electron microscopy (TEM) images. Axis Ultra XPS instrument with an Mg K $\alpha$  source is used to test the X-ray photoelectron spectroscopy (XPS). Varian Cary 5000 Scan UV-vis-NIR spectrometer is selected to test the UV-vis diffuse reflection. CHI 660E electrochemical workstation is selected to conduct the electrochemistry test in common three electrode system including the transient photocurrent response, electrochemical impedance spectroscopy (EIS), which uses Pt wire as reference electrode and Ag/AgCl electrode as counter electrode. Surface photovoltage (SPV) test is performed on a self-made device, including a lock-in amplifier and an optical chopper. Transient photovoltage (TPV) text is performed on a self-made device, including a oscilloscope (Tektronix MSO54) and a laser (Q-smart 450 ).

## Research of photocatalytic hydrogen production activities

A Pyrex glass cell with upside window is employed to evaluation the photocatalytic H<sub>2</sub> production activity of the samples. The lighting area is 38 cm<sup>2</sup>. A 300 W Xenon lamp with 420 bandpass filter is used as the light source. 0.05 g photocatalyst is suspended in 100 ml deionized water with 0.35 M Na<sub>2</sub>S and 0.25 M Na<sub>2</sub>SO<sub>3</sub> as sacrificial agent. The test interval period is 4 h. The H<sub>2</sub> production recycling test is similarly with the foregoing experimental process. The H<sub>2</sub>-evolution quantumefficiency (AQE) is measured according to the equation:

$$\text{AQE}(100\%) = \frac{2 \times n(\text{H}_2) \times N_0}{IS\lambda/(hc)} \times 100\%$$

where  $n(\text{H}_2)$  is the molar amount of unit time H<sub>2</sub> production,  $N_0$  is Avogadro's constant ( $6.022 \times 10^{23} \text{ mol}^{-1}$ ),  $I$  is the average irradiation intensity per unit area,  $S$  is the irradiation area,  $\lambda$  is the selected incident wavelength,  $h$  is Planck's constant ( $6.626 \times 10^{-34} \text{ J s}^{-1}$ ),  $c$  is the speed of light ( $3.0 \times 10^8 \text{ m s}^{-1}$ ).

### Calculation details

The Perdew–Burke–Ernzerh of (PBE) exchange-correlation functional is selected within the generalized gradient approximation (GGA). A cutoff energy is 400 eV. The convergence tolerance is  $1.0 \times 10^{-5} \text{ eV/atom}$  and  $0.05 \text{ eV/ \AA}$ . The work function of CdS (001) and MnS (111) can be obtained by geometry optimization. The calculation models show in Figure S1. The work function ( $\Phi$ ) is defined as  $\Phi = E_{\text{vac}} - E_{\text{f}}$ , where the  $E_{\text{vac}}$  is vacuum energy and  $E_{\text{f}}$  is Fermi energy.

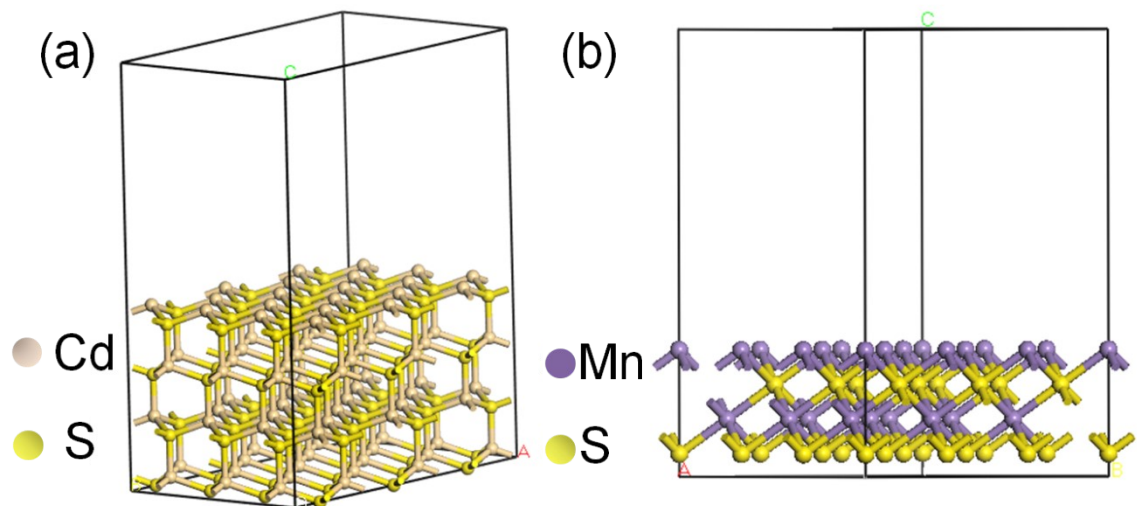

Figure S1 The calculation modes of (a) CdS(001) and (b) MnS (111) faces.

Table S1 The EDX elements content of samples

| Samples | Cd wt% | S wt% | Mn wt% |
|---------|--------|-------|--------|
| CMS-5   | 66.67  | 23.86 | 6.62   |
| CMS-10  | 43.62  | 28.38 | 28.00  |
| CMS-15  | 25.89  | 26.85 | 47.26  |
| CMS-20  | 13.68  | 29.38 | 59.94  |

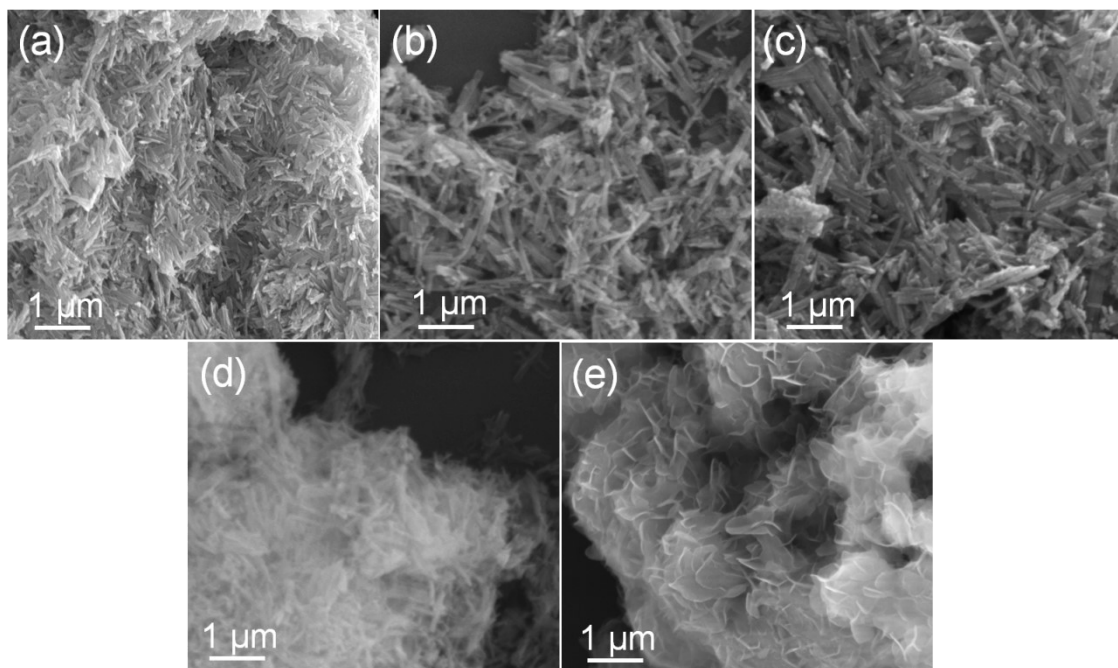

Figure S2 The SEM images of samples (a) CdS, (b) CMS-5, (c) CMS-10, (d) CMS-20,

(e) MnS.

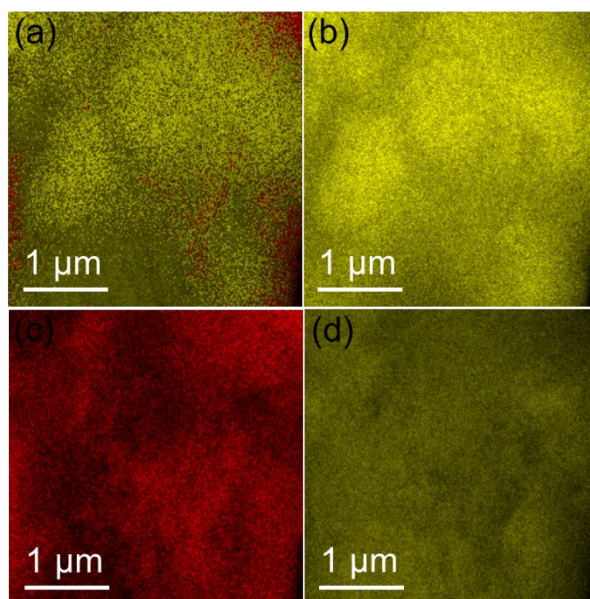

Figure S3 The EDX mapping of CMS-15. (a) Element distribution, (b) S , (c) Cd, (d)

Mn.

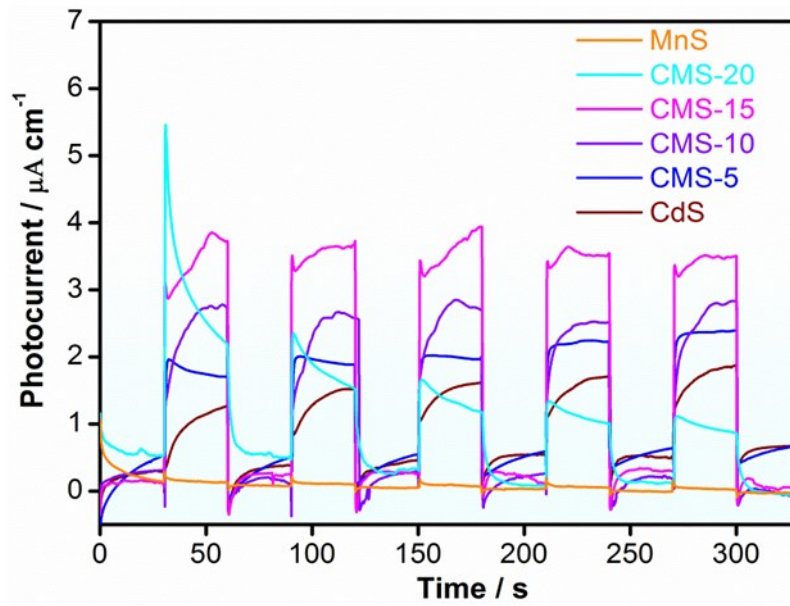

Figure S4 The transient photocurrent of samples.

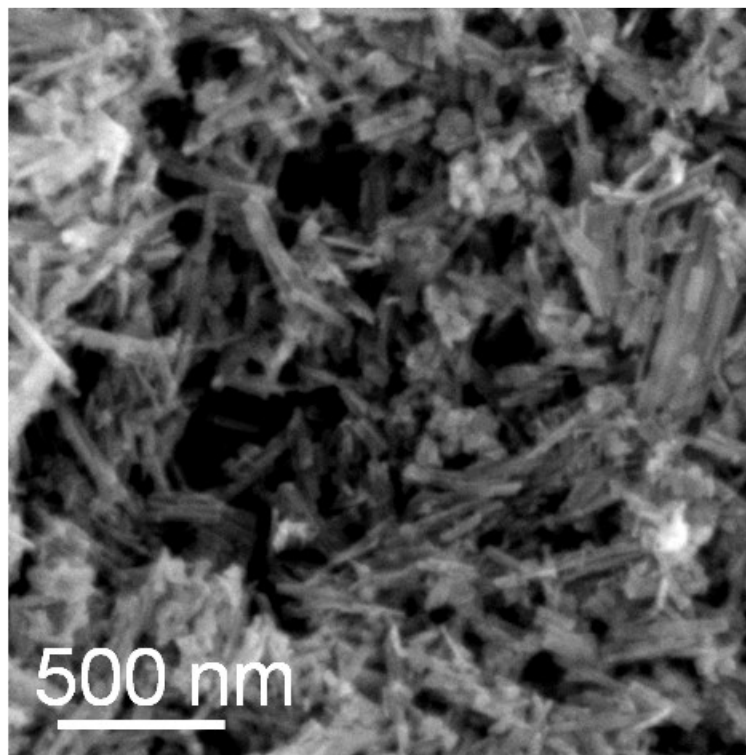

Figure S5 The SEM image of CMS-15.

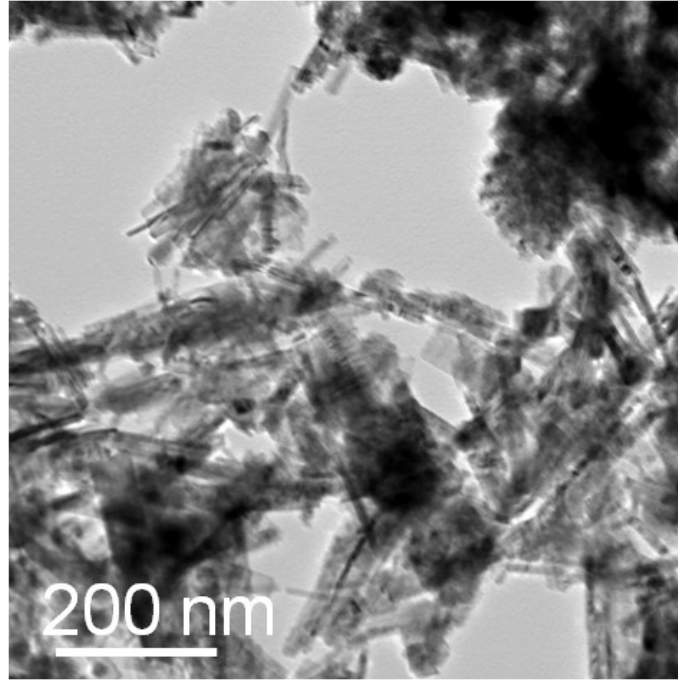

Figure S6 The TEM image of CMS-15 after 20 h recycling.

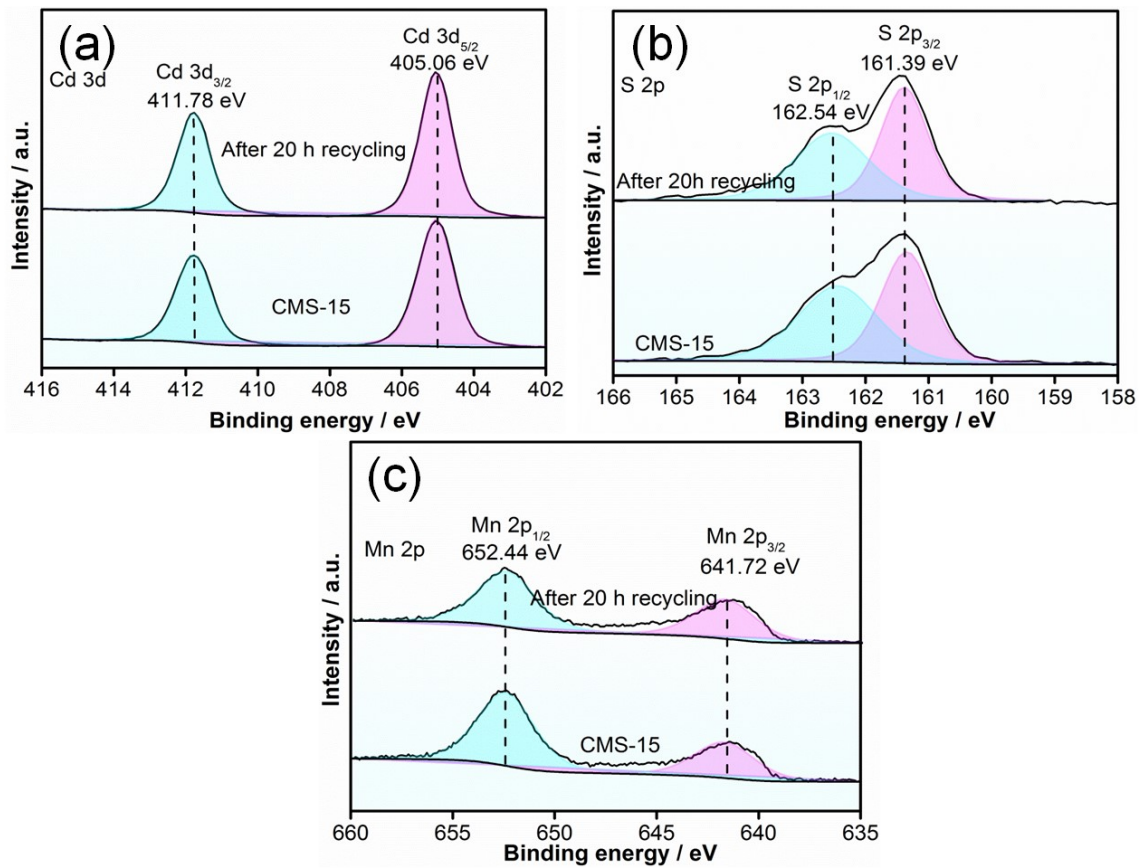

Figure S7 The high resolution XPS spectra of CMS-15 and after 20 h recycling. (a)

Cd 3d, (b) S 2p, (c) Mn 2p.



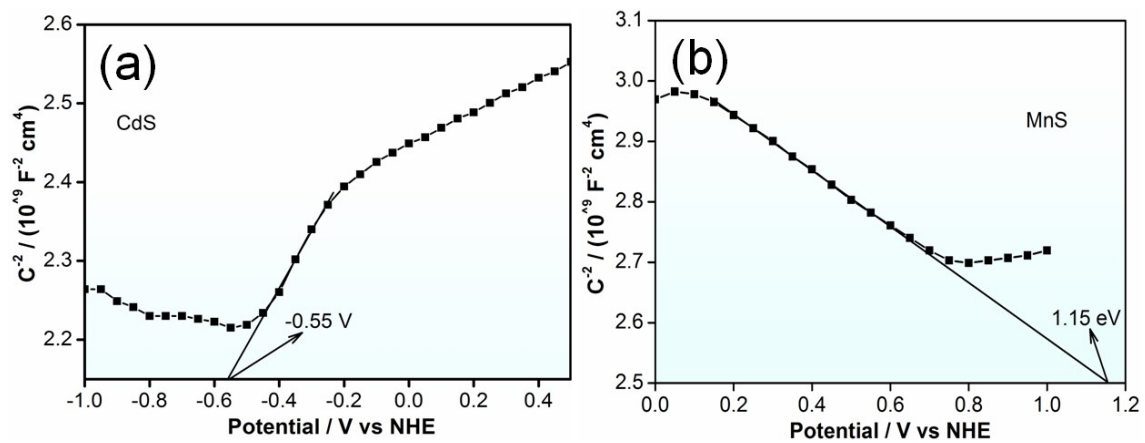

Figure S8 The Mott-Schottky plots of (a) CdS and (b) MnS.
